# Supplementary material
Source: Springer Nature journal article supplement (https://www.springermedizin.de/resource/supplementary/13229_2013_94_MOESM2_ESM.pdf/9676144)

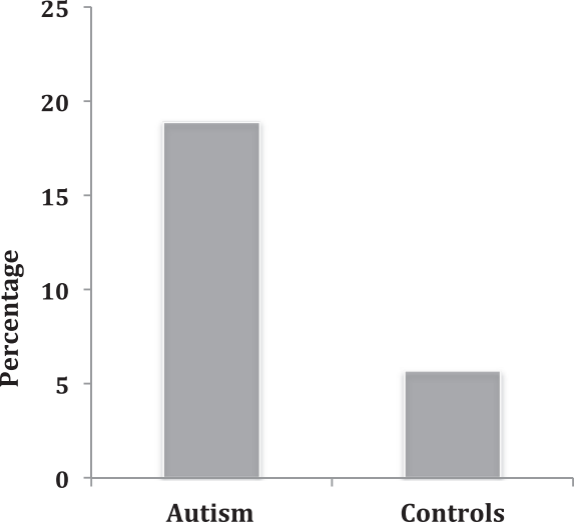

Supplement: MOESM2 [file 9676144]
